# Supplementary figures and images for: Proteomics reveals defective peroxisomal fatty acid oxidation during the progression of acute kidney injury and repair
Source: PubMed Central journal article supplement — Heliyon. 2023 Jul 17;9(7):e18134. doi: 10.1016/j.heliyon.2023.e18134 (PMC10395357; doi:10.1016/j.heliyon.2023.e18134), 2023-07-17

**A****Molecular function**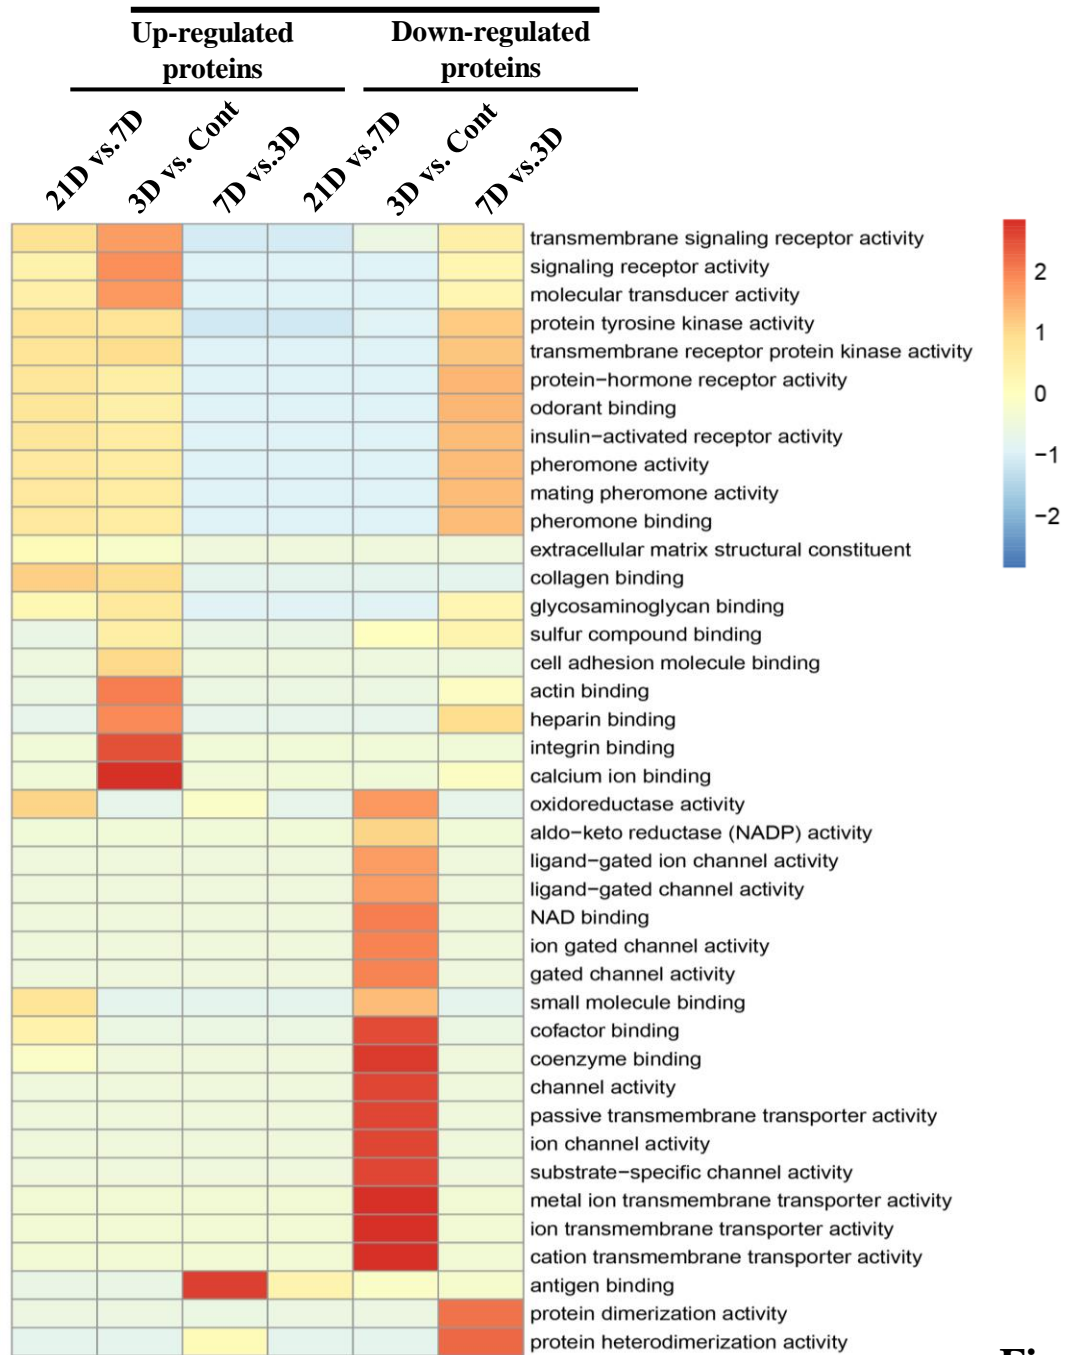**B****Cellular component**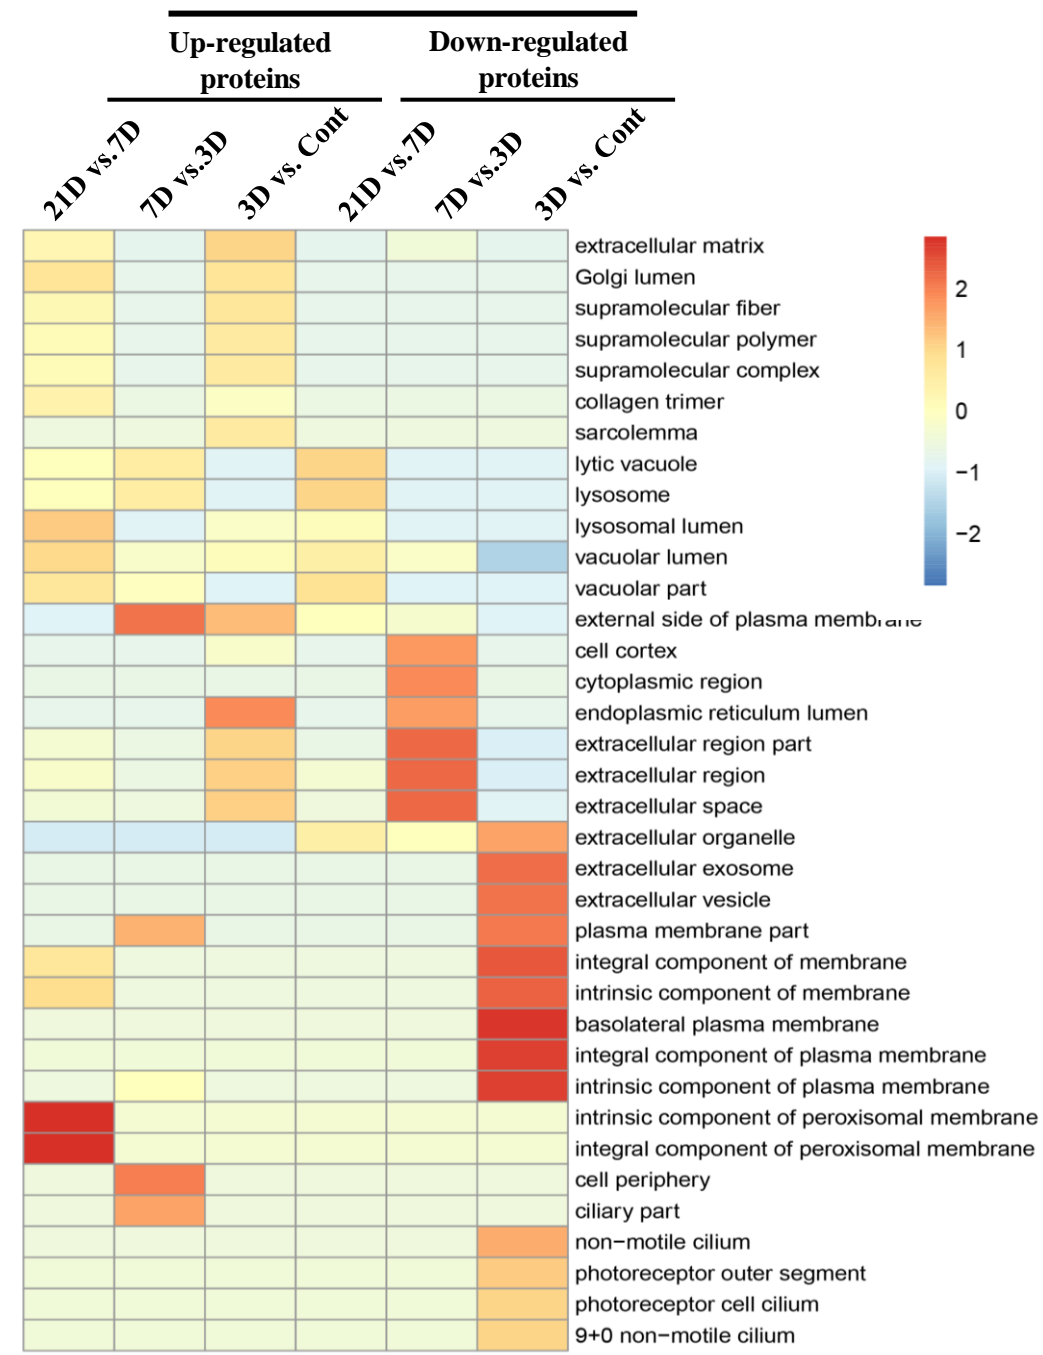**Figure S2**

Supplement: mmc2.pdf [file mmc2.pdf]
